# Supplementary material for: Clinical and biomarker analyses of sintilimab plus gemcitabine and cisplatin as first-line treatment for patients with advanced biliary tract cancer
Source: PubMed Central journal article supplement (PMC10008621; doi:10.1038/s41467-023-37030-w), 2023-03-11
Supplement: 41467_2023_37030_MOESM2_ESM.pdf [file 41467_2023_37030_MOESM2_ESM.pdf]

## **Description of Additional Supplementary Files**

Supplementary Data 1: Nanostring normalized gene expression data.
